# Supplementary material
Source: PubMed Central journal article supplement (PMC6410866)
Supplement: pnas.1820388116.sapp.pdf [file pnas.1820388116.sapp.pdf]

**Depletion of regulatory T cells in tumors with an anti-CD25 immunotoxin  
induces CD8 T cell-mediated systemic antitumor immunity**

**Masanori Onda, Kazuto Kobayashi, and Ira Pastan**

**SI APPENDIX**

**SUPPLEMENTAL FIGURES AND TABLES**

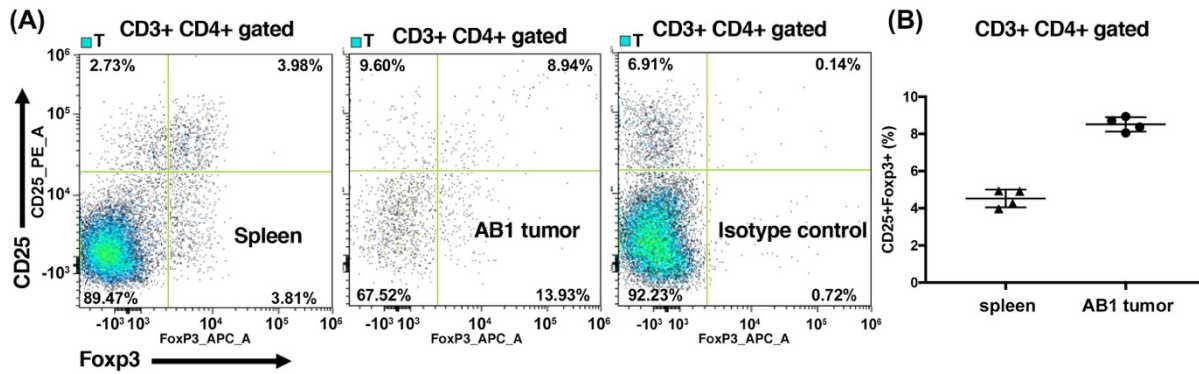

**Fig. S1.** Treg population in AB1 tumors compared to spleen. **(A)** Representative data of flow cytometry gated on CD3<sup>+</sup>CD4<sup>+</sup> cells. **(B)** An increased CD4<sup>+</sup>CD25<sup>+</sup>Foxp3<sup>+</sup> Treg population among CD4 T cells was observed in AB1 tumors compared to that in the spleen (n = 4). Tregs are abundant in tumors.

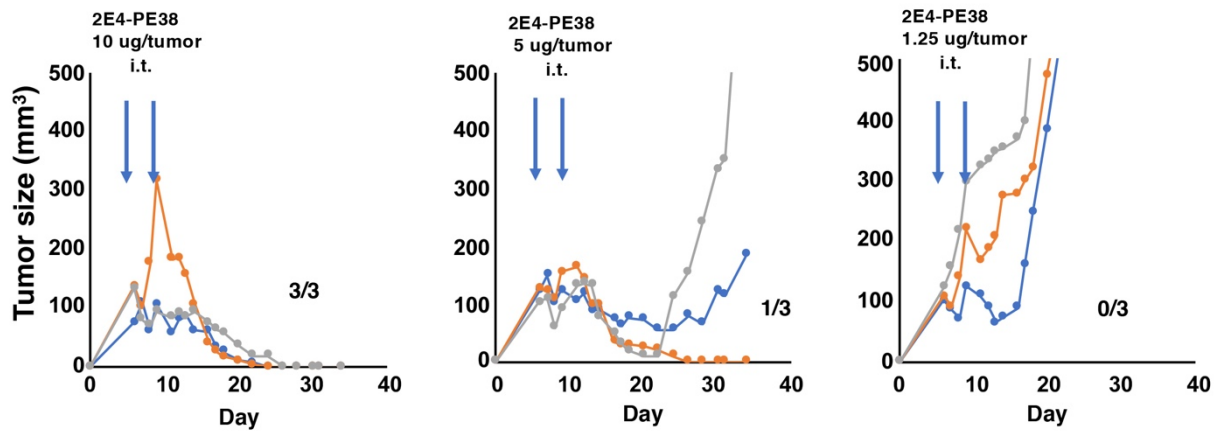

**Fig. S2.** Antitumor effect using various amounts of 2E4-PE38. BALB/c mice were implanted subcutaneously with AB1 tumors ( $5 \times 10^6$ ) on their dorsal side. Various amounts of 2E4-PE38 (left to right: 10, 5, and 1.25  $\mu\text{g}$ ) were injected into the tumor on days 5 and 9. Tumor growth was monitored with a caliper.

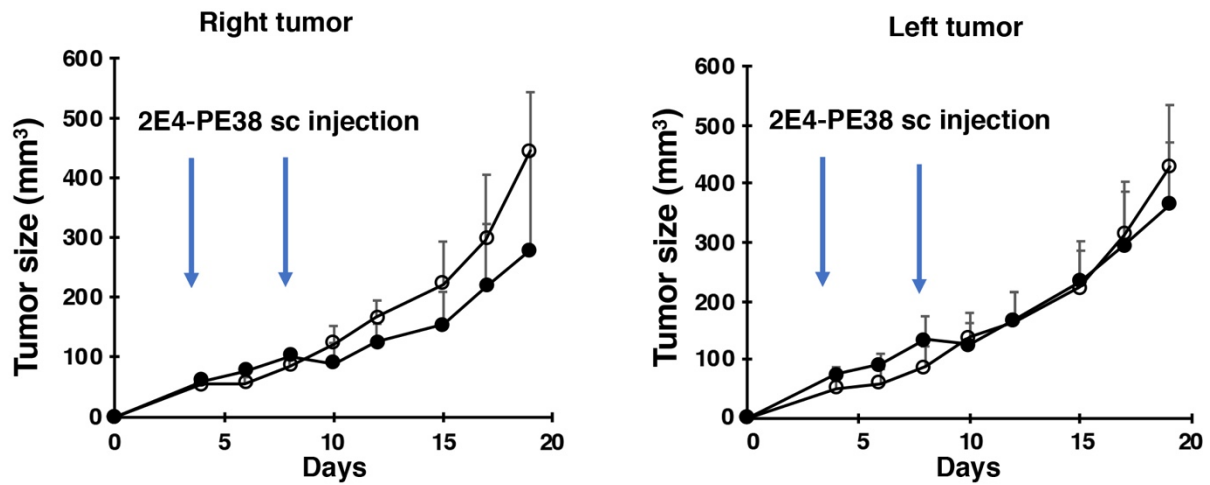

**Fig. S3.** No antitumor efficacy using subcutaneous injection of 2E4-PE38. BALB/c mice were implanted subcutaneously with 66c14 tumors ( $3 \times 10^6$ ) on both right and left dorsal side. On days 4 and 8, 2E4-PE38 ( $10 \mu\text{g}/100 \mu\text{l}$ ) was injected subcutaneously (injection point was 1 cm distance from each tumor). Tumor growth was monitored with a caliper. The tumor growth shows no difference between s.c. treated and nontreated groups at each time point ( $p > 0.5$ ). Mice bearing tumors did not have complete remission after s.c. treatment, indicating leaked 2E4-PE38 after intratumoral injection did not affect the shrinkage of untreated tumor, which was observed in Fig. 2.

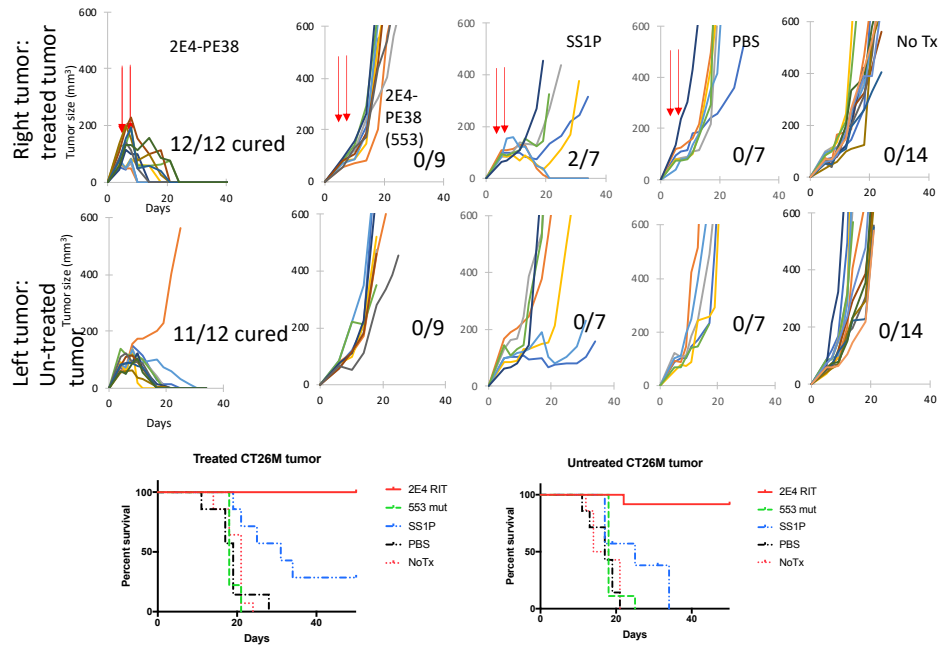

**Fig. S4.** Local 2E4-PE38 therapy is effective against colon cancer. BALB/c mice were implanted subcutaneously with CT26M ( $4 \times 10^6$ ) tumors on the back. Tumor growth was monitored with a digital caliper. 2E4-PE38 (10  $\mu$ g), 2E4-PE38-E553D inactive mutant (10  $\mu$ g), SS1P (10  $\mu$ g) or PBS (100  $\mu$ l) were injected into one right tumor site on days 5 and 9. Tumors were between 50-100 mm<sup>3</sup> on day 5. SS1P has some effect for shrinking right tumors because CT26M has some expression of human mesothelin. Mice survivals are shown in bottom graphs.

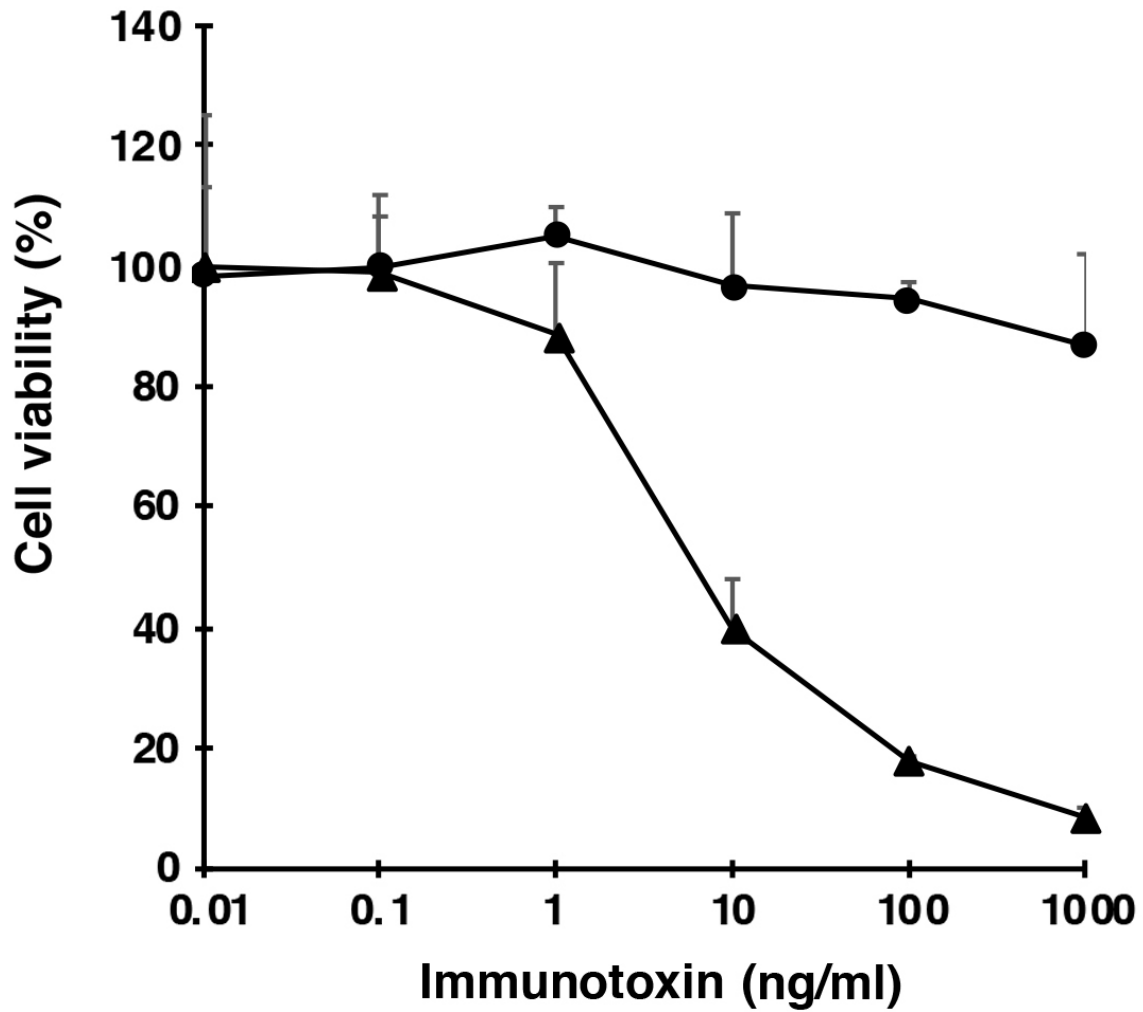

**Fig. S5.** Cytotoxic activity of SS1P using CT26M cells. Cell viability assay with CT26M cells shows that CT26M cells were sensitive to SS1P ( $IC_{50} = 3$  ng/ml,  $\blacktriangle$ ) and not sensitive for 2E4-PE38 ( $\bullet$ ).

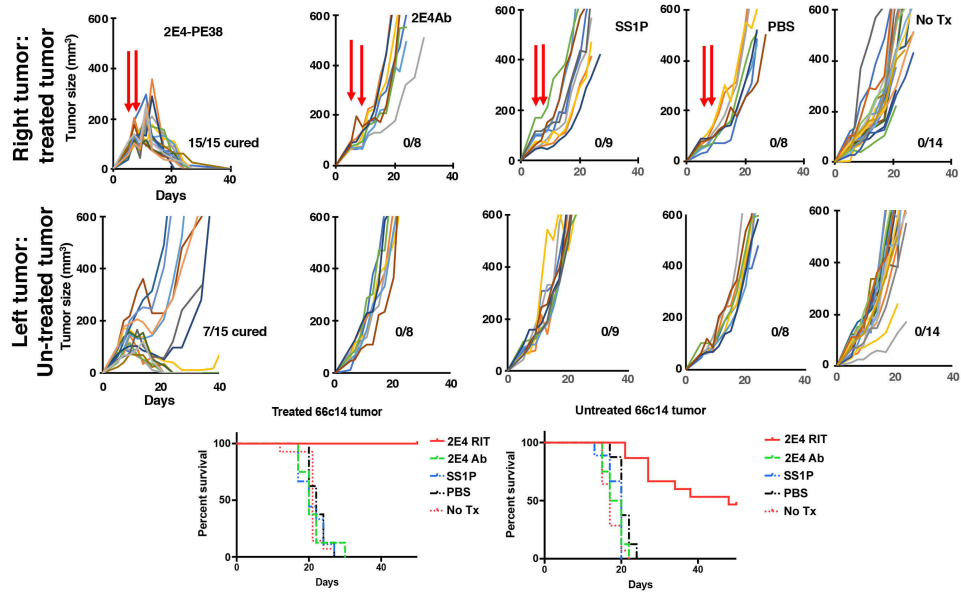

**Fig. S6.** Local 2E4-PE38 therapy is effective against breast cancer. BALB/c mice were implanted subcutaneously with 66c14 ( $3 \times 10^6$ ) tumors on both the right and left of their dorsal side. Tumor growth was monitored with a digital caliper. 2E4-PE38 (10  $\mu$ g), 2E4 antibody (10  $\mu$ g), SS1P (10  $\mu$ g) or PBS (100  $\mu$ l) were injected into one right tumor site on days 5 and 9. Tumors were between 50-100 mm<sup>3</sup> on day 5. Mice survivals are shown in bottom graphs. 2E4 Antibody is Rat IgG mAb, which may have a lower effector function in mice.

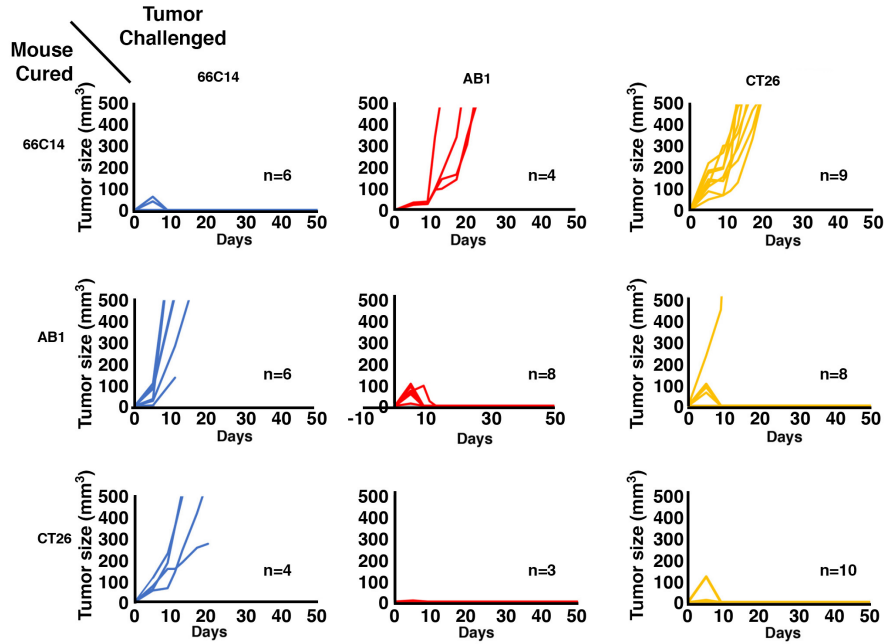

**Fig. S7.** Tumors undergoing complete regression are immune to re-challenge with other tumor cells. Mice with cured tumors (more than 50 days after complete remission of the tumor) were re-challenged with 66c14, AB1 and CT26M cells at three separate locations. Tumor size was measured by caliper. Upper column: cured mice with 66c14 tumors. Middle column: cured mice with AB1 tumors. Bottom column: cured mice with CT26M tumors. Survival plots are shown in Figure 3.



Table S1. 2E4-PE38 levels in serum after intratumoral injection (ng/ml)

| Minutes | Mice bearing ABI tumors |     |     |    |
|---------|-------------------------|-----|-----|----|
|         | #1                      | #2  | #3  | #4 |
| 3       | -                       | 571 | 777 | -  |
| 10      | -                       | 465 | 543 | -  |
| 30      | -                       | 311 | 422 | -  |
| 50      | -                       | -   | 252 | -  |
| 80      | -                       | -   | -   | -- |
| 120     | -                       | -   | -   | -  |

Mice bearing AB1 tumor (n=4) were injected with 10  $\mu$ g of 2E4-PE38 intratumorally and serum 2E4-PE38 levels (ng/ml) were monitored over time using ELISA.  
-, undetectable (less than 100 ng/ml)

Table S2. STR profiling of cells

| <b>Markers</b> | <b>AB1</b> | <b>CT26M</b> |
|----------------|------------|--------------|
| MCA-4-2        | 21.3, 22.3 | 21.3         |
| MCA-5-5        | 14         | 14           |
| MCA-6-4        | 18         | 18, 19       |
| MCA-6-7        | 12         | 12           |
| MCA-9-2        | 15         | 15           |
| MCA-12-1       | 17, 18     | 16, 17       |
| MCA-15-3       | 22.3, 23.3 | 21.3, 22.3   |
| MCA-18-3       | 18, 19     | 19, 20       |
| MCA-X-1        | 25         | 25, 26       |

Table S3. Antibodies for flow cytometry

| <b>Antibody (anti-mouse)</b>       | <b>Clone</b> | <b>Supplier</b> |
|------------------------------------|--------------|-----------------|
| anti-CD25-PE                       | PC61.5       | eBioscience     |
| anti-CD25-FITC                     | PC61.5.3     | Invitrogen      |
| anti-CD25-FITC                     | 7D4          | BD Pharmingen   |
| Anti-Foxp3-APC                     | FJK-16s      | eBioscience     |
| Anti-CD4-FITC                      | RM4-4        | BD Pharmingen   |
| Anti-CD4-APC                       | RM4-5        | eBioscience     |
| anti-CD3-Brilliant Violet605       | 17A2         | BioLegend       |
| anti-CD8a-PE                       | 53-6.7       | SouthernBiotech |
| anti-CD69-PE-Cy7                   | H1.2F3       | eBioscience     |
| anti-IFN $\gamma$ -PerCP-Cy5.5     | XMG1.2       | eBioscience     |
| anti-CD11b-PE                      | M1/70        | BD Pharmingen   |
| anti-Ly6G-APC                      | RB6-BC5      | eBioscience     |
| anti-CD11c-FITC                    | N418         | Invitrogen      |
| anti-MCH-II-PE                     | NIMR-4       | eBioscience     |
|                                    |              |                 |
| Arm Hamster IgG Iso Control-PE-Cy7 | eBio299Arm   | eBioscience     |
| Rat IgG2b Iso Control-FITC         | A95-1        | BD Pharmingen   |
| Rat IgG1 Iso Control-FITC          | eBRG1        | eBioscience     |
| Rat IgG2a Iso Control-FITC         | eBR2a        | eBioscience     |
| Rat IgG2a Iso Control-APC          | eBR2a        | eBioscience     |
| Rat IgG1 Iso Control-PerCP-Cy5.5   | eBRG1        | eBioscience     |
